# Supplementary material
Source: MDPI journal article supplement (https://www.mdpi.com/2073-4395/12/12/3060)
Supplement: s1 [file s1]

**Supplementary Table S1.** List of primers used for qRT-PCR analysis

| <b>Gene name</b>          | <b>Forward primer (5'-3')</b> | <b>Reverse primer (5'-3')</b> |
|---------------------------|-------------------------------|-------------------------------|
| <i>OsCBP60a</i>           | AGTGCATTGGATCCTTGTCC          | GAAGCCTTTCAATGCAGCTC          |
| <i>OsCBP60bcd-1</i>       | AAGGTGTTGGCACTGTAGGG          | GAGGATCTCGAACCACAAGC          |
| <i>OsCBP60bcd-2</i>       | ATATGATGGCAAGGCACTCC          | TATCGTCCTGCCTGATTTCC          |
| <i>OsCBP60bcd-3</i>       | GGTTTGCGAGTCTCTTCAGG          | ACACATGTCTTCGCATGCTC          |
| <i>OsCBP60g-1/OsSARDL</i> | TGAAGAGGGTTTTGGAGGTG          | TGGAAGTGCAGCTTGTATCG          |
| <i>OsCBP60g-2</i>         | AGGAAAACGTTGCAATGACC          | ATTGTTGGCGTGGTAAGGAG          |
| <i>OsCBP60g-3</i>         | CAAGCGTATGATGCTCTGGA          | CACCGTAGATCTGAGCCACA          |
| <i>OsCBP60g-4</i>         | ATGACGCTCAGTGATGATGC          | CTGGTCCGATCATGTTGTTG          |
| <i>OsCBP60g-5</i>         | AGTTCATGGGCATGTTCTC           | TGCTTTTCAAATCCCTCCAC          |
| <i>OsCBP60g-6</i>         | TGGCAAACCAAGACAAATCA          | GTCACCGAGGCTGCTATCTC          |
| <i>OsCBP60g-7</i>         | GGGTGAGCTGGACTGAAGAG          | TCCCATCTTTGCAGATTTCC          |
| <i>OsCBP60g-8</i>         | CAAGAGGCTTGTGGAGAAGG          | ATGCAATGTAACTGCCACCA          |
| <i>OsSARDL-1</i>          | GATGGTGAAGCAGATGCAG           | GACGTCGACGAGGATGATC           |
| <i>OsSARDL-2</i>          | ATTGGTCAGCCAAGCATACC          | TCAGCAGTTGAGGTTGTTGC          |
| <i>OsSARDL-3</i>          | GAGGCCAGATGATGAGGTG           | ATTGCCTGAGGCTGTCTTG           |
| <i>OsPRIa</i>             | ATGGCACCTTCCAAGGTCAG          | TGCAGGTTGACGTAGTCCTG          |
| <i>Rice ACTIN</i>         | GAGTATGATGAGTCGGGTCCAG        | ACACCAACAATCCCAAACAGAG        |

**Supplementary Table S2.** Prediction of CBDs in OsCBP60s

| <b>Gene name</b>          | <b>Interaction Prediction<br/>Score (using CaMELS)</b> | <b>Binding Site Score<br/>(using CaMELS)</b> |
|---------------------------|--------------------------------------------------------|----------------------------------------------|
| <i>OsCBP60bcd-1</i>       | 79.4                                                   | 1.85                                         |
| <i>OsCBP60bcd-2</i>       | 22.84                                                  | 1.85                                         |
| <i>OsCBP60bcd-3</i>       | 18.63                                                  | 1.85                                         |
| <i>OsCBP60a</i>           | 7.53                                                   | 1.53                                         |
| <i>OsSARDL-1</i>          | 4.3                                                    | 1.53                                         |
| <i>OsSARDL-2</i>          | 8.62                                                   | 1.89                                         |
| <i>OsSARDL-3</i>          | 3.22                                                   | 1.46                                         |
| <i>OsCBP60g-1/OsSARDL</i> | 1.62                                                   | 1.47                                         |
| <i>OsCBP60g-2</i>         | 1.45                                                   | 1.65                                         |
| <i>OsCBP60g-3</i>         | 2.46                                                   | 1.58                                         |
| <i>OsCBP60g-4</i>         | 1.3                                                    | 1.46                                         |
| <i>OsCBP60g-5</i>         | 3.82                                                   | 1.37                                         |
| <i>OsCBP60g-6</i>         | 13.72                                                  | 1.47                                         |
| <i>OsCBP60g-7</i>         | 4.49                                                   | 1.59                                         |
| <i>OsCBP60g-8</i>         | 2.17                                                   | 1.51                                         |

**Supplementary Table S3.** Analysis of transcription factor binding sites (TFBSs) in putative promoter sequences of *OsCBP60s* and *AtCBP60s*. The 1000 bp and 2000 bp upstream sequences of rice and Arabidopsis *CBP60* genes were retrieved from Phytozome and TAIR, respectively. The CAMATA, TGACG and W-box binding sequences were identified using Plant PAN 3 software. The BES1 and BZR1 TFBSs were identified manually.

| Gene name                 | BES1 |     | BZR1 |     | TGACG |     | CAMTA |     | WRKY |     |
|---------------------------|------|-----|------|-----|-------|-----|-------|-----|------|-----|
|                           | 1kb  | 2kb | 1kb  | 2kb | 1kb   | 2kb | 1kb   | 2kb | 1kb  | 2kb |
| <i>OsCBP60a</i>           | 08   | 13  | 00   | 00  | 07    | 07  | 00    | 00  | 06   | 08  |
| <i>OsCBP60bcd-1</i>       | 04   | 11  | 00   | 00  | 00    | 00  | 00    | 02  | 00   | 01  |
| <i>OsCBP60bcd-2</i>       | 09   | 11  | 00   | 00  | 02    | 03  | 03    | 04  | 03   | 03  |
| <i>OsCBP60bcd-3</i>       | 04   | 11  | 00   | 00  | 06    | 06  | 05    | 05  | 06   | 06  |
| <i>OsCBP60g-1/OsSARDL</i> | 02   | 08  | 00   | 01  | 05    | 08  | 03    | 06  | 00   | 00  |
| <i>OsCBP60g-2</i>         | 01   | 07  | 01   | 02  | 00    | 02  | 04    | 04  | 15   | 23  |
| <i>OsCBP60g-3</i>         | 02   | 07  | 01   | 01  | 06    | 13  | 12    | 12  | 13   | 35  |
| <i>OsCBP60g-4</i>         | 07   | 12  | 00   | 01  | 02    | 02  | 04    | 06  | 23   | 26  |
| <i>OsCBP60g-5</i>         | 04   | 08  | 00   | 00  | 02    | 07  | 00    | 00  | 08   | 13  |
| <i>OsCBP60g-6</i>         | 02   | 06  | 00   | 00  | 00    | 05  | 00    | 05  | 15   | 23  |
| <i>OsCBP60g-7</i>         | 03   | 07  | 00   | 00  | 00    | 00  | 04    | 04  | 09   | 09  |
| <i>OsCBP60g-8</i>         | 00   | 03  | 00   | 01  | 02    | 02  | 02    | 04  | 04   | 08  |
| <i>OsSARDL-1</i>          | 05   | 14  | 01   | 01  | 04    | 04  | 00    | 09  | 11   | 20  |
| <i>OsSARDL-2</i>          | 05   | 07  | 00   | 01  | 00    | 00  | 00    | 00  | 08   | 18  |
| <i>OsSARDL-3</i>          | 03   | 10  | 00   | 00  | 00    | 02  | 00    | 00  | 05   | 10  |
| <i>AtCBP60a</i>           | 03   | 06  | 00   | 00  | 06    | 06  | 01    | 01  | 10   | 23  |
| <i>AtCBP60b</i>           | 04   | 06  | 00   | 00  | 00    | 00  | 00    | 00  | 01   | 11  |
| <i>AtCBP60c</i>           | 03   | 06  | 00   | 00  | 00    | 00  | 06    | 06  | 19   | 20  |
| <i>AtCBP60d</i>           | 07   | 08  | 00   | 00  | 02    | 02  | 01    | 01  | 06   | 18  |
| <i>AtCBP60e</i>           | 07   | 12  | 00   | 00  | 00    | 00  | 06    | 06  | 13   | 45  |
| <i>AtCBP60f</i>           | 05   | 10  | 00   | 00  | 05    | 09  | 00    | 00  | 21   | 33  |
| <i>AtCBP60g</i>           | 03   | 05  | 00   | 00  | 08    | 13  | 03    | 03  | 32   | 46  |
| <i>SARD1</i>              | 04   | 05  | 00   | 00  | 40    | 42  | 01    | 14  | 23   | 32  |
